# Supplementary material for: Dynamic full-field optical coherence tomography allows live imaging of retinal pigment epithelium stress model
Source: PubMed Central journal article supplement (PMC9187748; doi:10.1038/s42003-022-03479-6), 2022-06-10
Supplement: 42003_2022_3479_MOESM2_ESM.pdf [file 42003_2022_3479_MOESM2_ESM.pdf]

## Reporting Summary

Nature Portfolio wishes to improve the reproducibility of the work that we publish. This form provides structure for consistency and transparency in reporting. For further information on Nature Portfolio policies, see our [Editorial Policies](#) and the [Editorial Policy Checklist](#).

### Statistics

For all statistical analyses, confirm that the following items are present in the figure legend, table legend, main text, or Methods section.

n/a Confirmed

- The exact sample size ( $n$ ) for each experimental group/condition, given as a discrete number and unit of measurement
- A statement on whether measurements were taken from distinct samples or whether the same sample was measured repeatedly
- The statistical test(s) used AND whether they are one- or two-sided  
*Only common tests should be described solely by name; describe more complex techniques in the Methods section.*
- A description of all covariates tested
- A description of any assumptions or corrections, such as tests of normality and adjustment for multiple comparisons
- A full description of the statistical parameters including central tendency (e.g. means) or other basic estimates (e.g. regression coefficient) AND variation (e.g. standard deviation) or associated estimates of uncertainty (e.g. confidence intervals)
- For null hypothesis testing, the test statistic (e.g.  $F$ ,  $t$ ,  $r$ ) with confidence intervals, effect sizes, degrees of freedom and  $P$  value noted  
*Give  $P$  values as exact values whenever suitable.*
- For Bayesian analysis, information on the choice of priors and Markov chain Monte Carlo settings
- For hierarchical and complex designs, identification of the appropriate level for tests and full reporting of outcomes
- Estimates of effect sizes (e.g. Cohen's  $d$ , Pearson's  $r$ ), indicating how they were calculated

*Our web collection on [statistics for biologists](#) contains articles on many of the points above.*

### Software and code

Policy information about [availability of computer code](#)

Data collection Olympus FLUOVIEW (confocal microscope software)  
Custom FFOCT software <https://zenodo.org/record/3137246> (recording of FFOCT and D-FFOCT images)

Data analysis Fiji ImageJ1.53c, Imaris x64 software (version 8.4.1 and 9.2.1 Bitplane) for immunohistochemistry images  
Fiji ImageJ1.53c, custom D-FFOCT analysis codes developed in Matlab (evaluation of different scratch assays parameters, rendering of D-FFOCT images) (<https://zenodo.org/record/5820201>) for D-FFOCT images

For manuscripts utilizing custom algorithms or software that are central to the research but not yet described in published literature, software must be made available to editors and reviewers. We strongly encourage code deposition in a community repository (e.g. GitHub). See the Nature Portfolio [guidelines for submitting code & software](#) for further information.

### Data

Policy information about [availability of data](#)

All manuscripts must include a [data availability statement](#). This statement should provide the following information, where applicable:

- Accession codes, unique identifiers, or web links for publicly available datasets
- A description of any restrictions on data availability
- For clinical datasets or third party data, please ensure that the statement adheres to our [policy](#)

No datasets were used in this study. All data shown in this study are available upon request with Kate Grieve (kategrieve@gmail.com). Videos are available online <https://zenodo.org/record/5894962>.

## Field-specific reporting

Please select the one below that is the best fit for your research. If you are not sure, read the appropriate sections before making your selection.

Life sciences  Behavioural & social sciences  Ecological, evolutionary & environmental sciences

For a reference copy of the document with all sections, see [nature.com/documents/nr-reporting-summary-flat.pdf](https://www.nature.com/documents/nr-reporting-summary-flat.pdf)

## Life sciences study design

All studies must disclose on these points even when the disclosure is negative.

|                 |                                                                                                                                                                                                                                            |
|-----------------|--------------------------------------------------------------------------------------------------------------------------------------------------------------------------------------------------------------------------------------------|
| Sample size     | The sample size was determined by the sample holder adapted to our FFOCT technique and to immunohistochemistry experiments (to ease replication).                                                                                          |
| Data exclusions | No data were excluded from the analyses.                                                                                                                                                                                                   |
| Replication     | The experiments done with FFOCT were performed multiple times: the number of samples studied are given in Supplementary information. The immunohistochemistry experiments were performed with at least 3 samples for each set of analysis. |
| Randomization   | Randomization was not relevant to our study: no experimental groups were defined for this study.                                                                                                                                           |
| Blinding        | Blinding was not relevant to our study: the images obtained with FFOCT were compared to immunohistochemistry images in order to determine the origin of the signal observed in our technique's images.                                     |

## Reporting for specific materials, systems and methods

We require information from authors about some types of materials, experimental systems and methods used in many studies. Here, indicate whether each material, system or method listed is relevant to your study. If you are not sure if a list item applies to your research, read the appropriate section before selecting a response.

### Materials & experimental systems

| n/a                                 | Involvement in the study                                        |
|-------------------------------------|-----------------------------------------------------------------|
| <input type="checkbox"/>            | <input checked="" type="checkbox"/> Antibodies                  |
| <input type="checkbox"/>            | <input checked="" type="checkbox"/> Eukaryotic cell lines       |
| <input checked="" type="checkbox"/> | <input type="checkbox"/> Palaeontology and archaeology          |
| <input type="checkbox"/>            | <input checked="" type="checkbox"/> Animals and other organisms |
| <input checked="" type="checkbox"/> | <input type="checkbox"/> Human research participants            |
| <input checked="" type="checkbox"/> | <input type="checkbox"/> Clinical data                          |
| <input checked="" type="checkbox"/> | <input type="checkbox"/> Dual use research of concern           |

### Methods

| n/a                                 | Involvement in the study                        |
|-------------------------------------|-------------------------------------------------|
| <input checked="" type="checkbox"/> | <input type="checkbox"/> ChIP-seq               |
| <input checked="" type="checkbox"/> | <input type="checkbox"/> Flow cytometry         |
| <input checked="" type="checkbox"/> | <input type="checkbox"/> MRI-based neuroimaging |

## Antibodies

Antibodies used

ATPs: ATP Synthase beta Monoclonal Antibody (3D5AB1), Mouse monoclonal, Cat# A-21351, RRID:AB\_221512, Thermo Fisher Scientific;

CATSD: cathepsin D (C-20) antibody, Goat polyclonal, Cat# sc-6486, RRID:AB\_637896, Santa Cruz Biotechnology;

coxIV: Anti-COX IV antibody [20E8C12], mouse monoclonal, Cat# ab14744, RRID:AB\_301443, Abcam;

TGN46 : TGN46 antibody, mouse monoclonal, Cat# ab50595, RRID:AB\_2203289, Abcam;

LAMP1 : LAMP1 antibody, rabbit polyclonal, Cat# ab24170, RRID:AB\_775978, Abcam;

anti Mouse Donkey polyclonal 488, Cat# A-21202, Invitrogen, RRID AB\_141607;

anti Rabbit Donkey polyclonal 594, Cat# A-21207, Invitrogen, RRID:AB\_141637;

anti Rabbit Donkey polyclonal 647, Cat# A-31573, Invitrogen, RRID:AB\_2536183

anti-Goat Donkey polyclonal Alexa 594, Cat# A-11058, Thermo Fisher Scientific, RRID:AB\_2534105

Monoclonal Anti-Ezrin antibody produced in mouse, Sigma-Aldrich Cat# E8897, RRID:AB\_476955

Validation

Primary antibodies validations: seller recommendations and relevant citations.

## Validation

AB\_221512 : seller recommendations: Applications: IF, ICC, WB.

PMID:16439467, PMID:16730322, PMID:17099894, PMID:17131355, PMID:18344451, PMID:18718527, PMID:18790061, PMID:19481066, PMID:19767061, PMID:19806589, PMID:20074638, PMID:20410436, PMID:20875793, PMID:20940630, PMID:21056597, PMID:21345788, PMID:21531334, PMID:21795630, PMID:21878618, PMID:21895890, PMID:21991365, PMID:22493494, PMID:22504705, PMID:22615909, PMID:23333404, PMID:23453926, PMID:23889209, PMID:24330338, PMID:24874806, PMID:25085991, PMID:25159328, PMID:25168043, PMID:25445031, PMID:25865307, PMID:26031781, PMID:26217791, PMID:26297831, PMID:28712724, PMID:30100261, PMID:30304679, PMID:30362197, PMID:30625316

AB\_637896, seller recommendations: ELISA; Immunohistochemistry; Immunoprecipitation; Immunofluorescence; Immunocytochemistry; Western Blot; WB, IP, IF, IHC(P).

PMID:25811319, PMID:25855184, PMID:28828399, PMID:30748001, PMID:31006538

AB\_301443, seller recommendations provided: Flow Cyt, IHC-FoFr, WB, ICC/IF, IHC-Fr, IHC-P, IP

PMID:24914935, PMID:28902411, PMID:29107503, PMID:30293865, PMID:30428348, PMID:31242426, PMID:32573439

AB\_476955 : seller recommendations: Applications: microarray, immunoprecipitation, immunocytochemistry; Immunohistochemistry; ; Western Blot;

PMID:25271146, PMID:28815590, PMID:31883834

AB\_2203289, seller recommendations provided: western blot, immunoprecipitation, immunocytochemistry

PMID:30057173, PMID:30122350, PMID:30811981, PMID:31348885, PMID:32778221

AB\_775978, seller recommendations provided: Immunocytochemistry; Immunofluorescence; Immunohistochemistry; Western Blot;

PMID:27641956, PMID:28552616, PMID:28919207, PMID:29149599, PMID:29804890, PMID:30269989, PMID:30271583, PMID:30311906, PMID:30404007, PMID:30566862, PMID:30612743, PMID:30910009, PMID:31006538, PMID:31061090, PMID:31261758, PMID:31453805, PMID:31848386, PMID:31934854, PMID:32320289, PMID:32671315

## Eukaryotic cell lines

Policy information about [cell lines](#)

Cell line source(s)

Human induced pluripotent stem cell (hiPSC) derived-RPE cell were generated at the Vision Institute (Paris, France) using established protocol using AHF1pi2 hiPSC clone as described in Reichman et al., 2017 PMID: 28220575.

Authentication

In accordance with French legislation, we certify that the elements or products of the human body or their derivatives obtained have been sampled and/or collected with the prior consent of the donor and that no payment of any form has been provided to the donor for this sample. Handling of donor tissues adhered to the tenets of the Declaration of Helsinki of 1975 and its 1983 revision in protecting donor confidentiality.

Mycoplasma contamination

We confirm that all cell lines were tested negative for mycoplasma contamination.

Commonly misidentified lines  
(See [ICLAC](#) register)

No misidentified cell lines were used in this study.

## Animals and other organisms

Policy information about [studies involving animals](#); [ARRIVE guidelines](#) recommended for reporting animal research

Laboratory animals

The study did not involved laboratory animals.

Wild animals

The study did not involved wild animals.

Field-collected samples

The study did not involved samples collected from the field.

Ethics oversight

Porcine eyes were bought at a local slaughterhouse (Guy Harang, Houdan, France) in agreement with the local regulatory department and the slaughterhouse veterinarians (agreement FR75105131). This procedure adheres to the European initiative for restricting animal experimentation as not a single animal was killed for our experimentation. Eyes were taken from animals sacrificed daily for human consumption.

Note that full information on the approval of the study protocol must also be provided in the manuscript.
